# Supplementary material for: PAHs in the Chinese environment: levels, inventory mass, source and toxic potency assessment
Source: Royal Society of Chemistry journal article supplement (doi:10.1039/c3em00070b), 2013-01-01
Supplement: c3em00070b.pdf [file c3em00070b.pdf]

## Supplementary Material

**MANUSCRIPT TITLE:** PAHs in Chinese environment: levels, inventory mass,  
source and toxic potency assessment

**AUTHORS:** Ji-Zhong Wang, Cheng-Zhu Zhu, Tian-Hu Chen

**Affiliation:** School of Resources and Environmental Engineering, Hefei  
University of Technology, Hefei 230009, China

**JOURNAL:** Journal of Environmental Monitoring

**NO. OF PAGES:** 43

**NO. OF TABLES:** 4

**NO. FIGURES:** 1

Table S1. Basic information of natural source and economic and social development (all of these data were obtained from a database called Scientific Database of Chinese Academy of Sciences <sup>1</sup>).

|                           | Land area<br>(km <sup>2</sup> ) | Watershed<br>area (km <sup>2</sup> ) | Glacier/desert<br>area (km <sup>2</sup> ) | Urban area<br>(km <sup>2</sup> ) | Rural area<br>(km <sup>2</sup> ) <sup>a</sup> | Transportation<br>area (km <sup>2</sup> ) <sup>b</sup> | Total water resources<br>volume (× 10 <sup>8</sup> m <sup>3</sup> ) |
|---------------------------|---------------------------------|--------------------------------------|-------------------------------------------|----------------------------------|-----------------------------------------------|--------------------------------------------------------|---------------------------------------------------------------------|
| <b>Northern China</b>     |                                 |                                      |                                           |                                  |                                               |                                                        |                                                                     |
| Beijing                   | 1.6E+04                         | 1.1E+02                              | 0.0E+00                                   | 5.5E+03                          | 9.9E+03                                       | 3.6E+02                                                | 4.1E+01                                                             |
| Tianjing                  | 1.2E+04                         | 3.0E+02                              | 0.0E+00                                   | 4.3E+03                          | 7.0E+03                                       | 3.3E+02                                                | 1.5E+01                                                             |
| Hebei                     | 1.9E+05                         | 6.3E+02                              | 1.1E+03                                   | 5.8E+03                          | 1.8E+05                                       | 3.1E+03                                                | 2.4E+02                                                             |
| Shanxi                    | 1.6E+05                         | 5.6E+02                              | 1.6E+03                                   | 8.8E+03                          | 1.4E+05                                       | 1.6E+03                                                | 1.4E+02                                                             |
| Inner Mongolia            | 1.2E+06                         | 4.0E+03                              | 2.5E+05                                   | 1.3E+04                          | 9.1E+05                                       | 3.2E+03                                                | 5.1E+02                                                             |
| Total                     | 1.5E+06                         | 5.6E+03                              | 2.5E+05                                   | 3.8E+04                          | 1.2E+06                                       | 8.6E+03                                                | 9.4E+02                                                             |
| <b>Northeastern China</b> |                                 |                                      |                                           |                                  |                                               |                                                        |                                                                     |
| Liaoning                  | 1.6E+05                         | 1.5E+03                              | 0.0E+00                                   | 1.5E+04                          | 1.5E+05                                       | 2.2E+03                                                | 3.6E+02                                                             |
| Jilin                     | 1.8E+05                         | 1.2E+03                              | 4.0E+01                                   | 5.9E+04                          | 1.2E+05                                       | 2.3E+03                                                | 3.9E+02                                                             |
| Heilongjiang              | 4.6E+05                         | 4.8E+03                              | 0.0E+00                                   | 1.7E+03                          | 4.4E+05                                       | 4.6E+03                                                | 7.8E+02                                                             |
| Total                     | 8.0E+05                         | 7.5E+03                              | 4.0E+01                                   | 7.5E+04                          | 7.1E+05                                       | 9.1E+03                                                | 1.5E+03                                                             |
| <b>Eastern China</b>      |                                 |                                      |                                           |                                  |                                               |                                                        |                                                                     |
| Shanghai                  | 7.1E+03                         | 1.3E+03                              | 0.0E+00                                   | 2.6E+03                          | 3.0E+03                                       | 1.9E+02                                                | 2.7E+01                                                             |
| Jiangsu                   | 1.0E+05                         | 1.4E+04                              | 1.6E+02                                   | 6.0E+03                          | 7.9E+04                                       | 2.8E+03                                                | 3.3E+02                                                             |
| Zhejiang                  | 1.0E+05                         | 1.4E+03                              | 0.0E+00                                   | 8.5E+03                          | 8.9E+04                                       | 1.0E+03                                                | 9.0E+02                                                             |
| Anhui                     | 1.4E+05                         | 4.9E+03                              | 2.0E+00                                   | 7.5E+03                          | 1.3E+05                                       | 2.6E+03                                                | 6.8E+02                                                             |
| Fujian                    | 1.2E+05                         | 5.6E+02                              | 0.0E+00                                   | 1.0E+04                          | 1.1E+05                                       | 9.1E+02                                                | 1.2E+03                                                             |
| Shandong                  | 1.6E+05                         | 1.3E+03                              | 8.8E+02                                   | 2.7E+04                          | 1.2E+05                                       | 4.6E+03                                                | 3.4E+02                                                             |
| Total                     | 6.3E+05                         | 2.3E+04                              | 1.0E+03                                   | 6.2E+04                          | 5.3E+05                                       | 1.2E+04                                                | 3.4E+03                                                             |
| <b>Central China</b>      |                                 |                                      |                                           |                                  |                                               |                                                        |                                                                     |
| Jiangxi                   | 1.7E+05                         | 5.1E+03                              | 0.0E+00                                   | 5.7E+03                          | 1.6E+05                                       | 1.2E+03                                                | 1.4E+03                                                             |
| Henan                     | 1.6E+05                         | 1.9E+03                              | 1.5E+03                                   | 8.0E+03                          | 1.4E+05                                       | 3.8E+03                                                | 4.1E+02                                                             |

---

|                       |         |         |         |         |         |         |         |
|-----------------------|---------|---------|---------|---------|---------|---------|---------|
| Hubei                 | 1.9E+05 | 4.6E+03 | 0.0E+00 | 1.8E+04 | 1.6E+05 | 2.1E+03 | 9.8E+02 |
| Hunan                 | 2.1E+05 | 4.3E+03 | 0.0E+00 | 1.6E+04 | 1.9E+05 | 1.5E+03 | 1.6E+03 |
| Total                 | 7.3E+05 | 1.6E+04 | 1.5E+03 | 4.7E+04 | 6.5E+05 | 8.7E+03 | 4.4E+03 |
| <b>Southern China</b> |         |         |         |         |         |         |         |
| Guangdong             | 1.9E+05 | 8.5E+03 | 0.0E+00 | 1.6E+04 | 1.6E+05 | 1.3E+03 | 2.1E+03 |
| Guangxi               | 2.4E+05 | 1.2E+03 | 0.0E+00 | 1.7E+04 | 2.2E+05 | 1.3E+03 | 1.9E+03 |
| Hainan                | 3.5E+04 | 8.1E+01 | 0.0E+00 | 2.2E+03 | 3.2E+04 | 2.6E+02 |         |
| Total                 | 4.6E+05 | 9.8E+03 | 0.0E+00 | 3.5E+04 | 4.1E+05 | 2.9E+03 | 4.0E+03 |
| <b>Western China</b>  |         |         |         |         |         |         |         |
| Sichuan               | 5.7E+05 | 1.8E+02 | 1.3E+04 | 2.3E+04 | 5.3E+05 | 9.2E+02 | 3.1E+03 |
| Guangzhou             | 1.8E+05 | 5.4E+01 | 0.0E+00 | 9.0E+03 | 1.6E+05 | 2.7E+03 | 1.0E+03 |
| Yunnan                | 3.8E+05 | 6.6E+02 | 1.5E+03 | 8.4E+03 | 3.7E+05 | 8.3E+02 | 2.2E+03 |
| Xizang                | 1.2E+06 | 2.2E+04 | 4.5E+04 |         | 1.1E+06 | 2.5E+03 | 4.5E+03 |
| Shaanxi               | 2.1E+05 | 2.8E+02 | 7.5E+03 | 8.4E+03 | 1.9E+05 | 2.3E+02 | 4.4E+02 |
| Gansu                 | 4.0E+05 | 2.4E+02 | 6.1E+04 | 1.6E+04 | 3.2E+05 | 1.4E+03 | 2.7E+02 |
| Qinghai               | 7.1E+05 | 1.2E+04 | 6.2E+04 | 3.5E+02 | 6.4E+05 | 1.7E+03 | 6.3E+02 |
| Ningxia               | 5.2E+04 | 5.2E+02 | 4.6E+03 | 1.8E+03 | 4.4E+04 | 4.4E+02 | 9.9E+00 |
| Xinjiang              | 1.7E+06 | 5.2E+03 | 6.5E+05 | 1.0E+04 | 1.0E+06 | 3.4E+02 | 8.8E+02 |
| Total                 | 5.4E+06 | 4.2E+04 | 8.4E+05 | 7.7E+04 | 4.4E+06 | 1.1E+04 | 1.3E+04 |

<sup>a</sup>: Transportation area was considered as urban area. <sup>b</sup>: rural area was calculated by total land area excluding watershed area, glacier/desert, urban area and transportation area.

---

Table S2. The geometric mean concentration of individual PAHs and  $\Sigma_{14}$ PAH in China's and global air (ng/m<sup>3</sup>), soil (ng/g), freshwater (ng/L), seawater (ng/L), terrestrial sediment (ng/g) and marine sediment (ng/g) for. All data were obtained from the previously published papers listed in Tables S4

| Compound               | abbreviation | air   |        | soil  |        | fresh water |        | seawater |        | sediment |        | marine sediment |        |
|------------------------|--------------|-------|--------|-------|--------|-------------|--------|----------|--------|----------|--------|-----------------|--------|
|                        |              | China | global | China | global | China       | global | China    | global | China    | global | China           | global |
| acenaphthene           | Ace          | 6.1   | 1.0    | 5.0   | 7.5    | 29          | 7.9    | 3.7      | 3.8    | 16       | 15     | 9.4             | 5.5    |
| fluorene               | Fl           | 21    | 2.2    | 9.2   | 7.5    | 44          | 7.4    | 17       | 4.5    | 25       | 14     | 15              | 8.4    |
| phenanthrene           | Phe          | 50    | 7.5    | 44    | 48     | 63          | 11     | 30       | 5.5    | 64       | 37     | 35              | 30     |
| anthracene             | Ant          | 3.3   | 0.30   | 6.5   | 11     | 14          | 3.6    | 3.4      | 1.8    | 19       | 22     | 14              | 12     |
| fluoranthene           | Flu          | 12    | 1.6    | 28    | 46     | 27          | 13     | 7.0      | 8.2    | 51       | 40     | 32              | 35     |
| pyrene                 | Pyr          | 8.0   | 1.0    | 25    | 35     | 24          | 14     | 7.3      | 4.1    | 47       | 50     | 36              | 40     |
| benzo[a]anthracene     | BaA          | 1.5   | 0.10   | 15    | 24     | 7.0         | 7.6    | 3.1      | 1.1    | 29       | 23     | 20              | 17     |
| chrysene               | Chr          | 2.5   | 0.20   | 19    | 30     | 6.6         | 9.3    | 8.4      | 3.2    | 38       | 39     | 27              | 32     |
| benzo[b]fluoranthene   | BbF          | 1.8   | 0.30   | 22    | 52     | 7.7         | 12     | 2.0      | 3.2    | 36       | 23     | 23              | 21     |
| benzo[k]fluoranthene   | BkF          | 0.90  | 0.30   | 14    | 25     | 5.4         | 5.9    | 1.4      | 10     | 25       | 18     | 15              | 15     |
| benzo[a]pyrene         | BaP          | 0.90  | 0.10   | 14    | 16     | 8.3         | 5.0    | 1.4      | 0.4    | 25       | 21     | 18              | 18     |
| indeno[1,2,3-cd]pyrene | Ind          | 1.2   | 0.20   | 12    | 18     | 4.8         | 3.8    | 1.7      | 3.4    | 24       | 41     | 26              | 28     |
| dibenzo[a,h]anthracene | DahA         | 0.40  | 0.0    | 9.2   | 4.9    | 8.5         | 3.1    | 1.4      | 1.5    | 22       | 13     | 11              | 7.9    |
| benzo[ghi]perylene     | BghiP        | 1.4   | 0.20   | 13    | 23     | 7.6         | 5.1    | 2.2      | 0.90   | 29       | 44     | 27              | 34     |
| $\Sigma_{14}$ PAH      |              | 110   | 15     | 240   | 350    | 260         | 110    | 89       | 52     | 450      | 400    | 310             | 300    |

Table S3. The areas and water volumes of each sea in China, the data were from the reference<sup>2</sup>

|                              | Area (km <sup>2</sup> ) | Water volume (m <sup>3</sup> ) |
|------------------------------|-------------------------|--------------------------------|
| South China Sea <sup>a</sup> | 1.8×10 <sup>6</sup>     | 1.84×10 <sup>14</sup>          |
| East China Sea <sup>a</sup>  | 5.3×10 <sup>5</sup>     | 4.4×10 <sup>13</sup>           |
| Yellow Sea                   | 3.8×10 <sup>5</sup>     | 1.7×10 <sup>13</sup>           |
| Bohai Sea                    | 7.7×10 <sup>4</sup>     | 1.4×10 <sup>12</sup>           |

<sup>a</sup>: the fraction with the water depth more than 200 m were not contained

Table S4. The data sources

| <b>Atmosphere</b> |                      |                             |                      |                  |
|-------------------|----------------------|-----------------------------|----------------------|------------------|
| <b>China:</b>     |                      |                             |                      |                  |
| <i>Location</i>   | <i>Sampling time</i> | <i>Sampling area</i>        | <i>References</i>    |                  |
| Tianjin (*)       | 2006                 | Residence/business sites    | 3                    |                  |
| Hangzhou          | 2006                 | Public sites                | 4                    |                  |
| Hangzhou(*)       | 2006/2007            | Residence sites             | 5                    |                  |
| Hangzhou          | 1999/2000            | Residence kitchen           | 6                    |                  |
| Hangzhou          | 2006                 | Urban area                  | 7                    |                  |
| Hong Kong (*,+,-) | 1999/2000            | Traffic sites               | 8                    |                  |
| Hong Kong         | 2000                 | Urban sites                 | 9                    |                  |
| Taiwan(*,+,-)     | 2001                 | Suburban                    | 10                   |                  |
| Taiwan (*)        | 2002/2003            | Industrial/university sites | 11                   |                  |
| Taiwan            | Unknown              | Industrial area             | 12                   |                  |
| Guangzhou (*)     | 2001/2002            | Urban site                  | 13                   |                  |
| Guangzhou         | 2005/2006            | Urban area                  | 14                   |                  |
| Waliguan, Qinghai | 2005                 | Rural site                  | 15                   |                  |
| China             | 2005                 | Urban/rural sites           | 16, 17               |                  |
| Shenzhen          | 2006-2007            | Urban area                  | 18                   |                  |
| Beijing-Tianjin   | 2007-2008            | rural/urban area            | 19                   |                  |
| Xiamen            | 2008                 | urban area                  | 20                   |                  |
| Heilongjiang      | 2008-2009            | urban area                  | 21                   |                  |
| Zhangzi Island    | 2008-2009            | Rural area                  | 22                   |                  |
| <b>Global:</b>    |                      |                             |                      |                  |
| <i>Country</i>    | <i>Location</i>      | <i>Sampling time</i>        | <i>Sampling area</i> | <i>Reference</i> |
| Japan             | Shizuoka             | 1996                        | Home                 | 23               |
| Japan             | Fuji/Shimizu         | 1999/2000                   | Urban area           | 24               |

---

|                   |                     |           |                                         |    |
|-------------------|---------------------|-----------|-----------------------------------------|----|
| Singapore         | Kent Ridge          | 2006      | suburban area                           | 25 |
| Iran              | Tehran              | 2004/2005 | Urban area                              | 26 |
| Brazil            | State of Amazonas   | 2001      | Urban/forst                             | 27 |
| Brazil            | Campo Grande,       | 2003      | Urban/industrial sites                  | 28 |
| USA               | Florida             | 2002      | Near estuary                            | 29 |
| USA               | Lake Superior       | 1986      | Lake sites                              | 30 |
| USA               | Chicago             | 1994/1995 | Urban/Lake                              | 31 |
| USA               | Chicago             | 1995      | Residence/commercial area               | 32 |
| USA               | Lower Manhattan, NY | 2001      | Urban area                              | 33 |
| USA               | New Jersey          | 1997/1998 | Traffic/coastal area                    | 34 |
| Australia         | Brisbane            | 2002      | Urban/traffic sites                     | 35 |
| Australia         | South Brisban       | 2002      | Unknown                                 | 36 |
| Australia         | Brisbane            | Unknown   | Urban area                              | 37 |
| Canada            | Southern Ontario    | 2001/2002 | Forest/rural area                       | 38 |
| Canada            | Alert/Tagish        | 1992/1994 | Rural area                              | 39 |
| Greece            | Athens              | 2003      | Suburban                                | 40 |
| Sweden            | Stockholm,          | 2003      | Indoor                                  | 41 |
| UK                | Lancaster           | 1995      | Rural                                   | 42 |
| UK                | Birmingham          | 1992/1997 | Urban/rural area                        | 43 |
| UK                | London/Manchester   | 1991/1992 | Urban area                              | 44 |
| Russia            | Dunai               | 1992/1994 | Rural area                              | 39 |
| Belgium           | Flanders            | 2001/2002 | Urban/suburban/traffic/industrial sites | 45 |
| Spain             | Masnou Harbor       | 2001      | Rural area                              | 46 |
| Turkey            | Izmir               | 2003/2004 | suburban/urban area                     | 47 |
| Turkey            | Bursa               | 2004/2005 | Urban area                              | 48 |
| Turkey            | Zonguldak           | 2007/2008 | Industrial area                         | 49 |
| Bosnia            | Banja Luka          | 2008      | Urban/rural area                        | 50 |
| Mediterranean sea | Mediterranean sea   | 2000/2002 | Rural area                              | 51 |
| Pacific Ocean     | North Pacific Ocean | 2003      | Rural sites                             | 52 |
| Atlantic Ocenan   | Atlantic transect   | 2001      | Rural area                              | 53 |

---

---

## Soil

### China: Northern China

| <i>Location</i>         | <i>Sampling time</i> | <i>Sampling area</i>            | <i>Depth (cm)</i> | <i>Reference</i> |
|-------------------------|----------------------|---------------------------------|-------------------|------------------|
| <i>Rural</i>            |                      |                                 |                   |                  |
| Beijing (*,-)           | 2004                 | Suburban area/town <sup>a</sup> | 0–10              | 54               |
| Beijing                 | Unknown              | Farmland                        | 0–10              | 55               |
| Tianjin                 | 2002                 | Less contaminated area          | 0–20              | 56               |
| Tianjin(*,-)            | 2001                 | Rural/Urban area <sup>a</sup>   | 0–10              | 57               |
| Beijing-Tianjin         | 2008                 | Agricultural soil               | 0–20              | 58               |
| <i>Urban</i>            |                      |                                 |                   |                  |
| Beijing(+)              | 2004                 | Suburban area/town <sup>a</sup> | 0–10              | 54               |
| Beijing                 | 2008                 | urban area                      | 0–20              | 59               |
| Tianjin                 | 2002                 | Urban area                      | 0–20              | 56               |
| Tianjin(+)              | 2001                 | Rural/urban area <sup>a</sup>   | 0–10              | 57               |
| Taiyuan (*,+,-)         | Unknown              | Urban area                      | 0–20              | 60               |
| Benxi                   | 2008                 | Industrial areas                | 0–10              | 61               |
| Beijing-Tianjin         | 2007                 | Urban area                      | 0–5               | 62               |
| <b>Eastern China</b>    |                      |                                 |                   |                  |
| <i>Rural</i>            |                      |                                 |                   |                  |
| Zhejiang Province (*,-) | 2005/2006            | Urban/rural area <sup>a</sup>   | Unknown           | 63               |
| MinJiang River (*,+,-)  | 1999                 | Agricultural soil               | Unknown           | 64               |
| Yangtze Delta (*,+)     | 2003                 | Farmland                        | 0–20              | 65               |
| Jiangsu                 | 2004                 | Ecological demonstration area   | 5–15              | 57               |
| Jiangsu (*,+,-)         | Unknown              | Agricultural area               | 0–15              | 66               |

---



|                             |           |                                |         |    |
|-----------------------------|-----------|--------------------------------|---------|----|
| Huaian                      | Unknown   | Farmland                       | 0–20    | 67 |
| Shanghai                    | 2007      | Agricultural area              | 0–15    | 68 |
| Shandong                    | 2008      | Agricultural area              | 0–15    | 69 |
| <i>Urban</i>                |           |                                |         |    |
| Zhejiang Province (+)       | 2005/2006 | Urban/rural area <sup>a</sup>  | Unknown | 63 |
| Yangtze River Delta (*,+,-) | Unknown   | Industrial areas and roadsides | Unknown | 70 |
| Nanjing                     | Unknown   | Industrial area                | 0–10    | 71 |
| Xuzhou (*,+,-)              | Unknown   | Industrial area                | Unknown | 72 |
| Huaian                      | Unknown   | Traffic/urban area             | 0–20    | 67 |
| Anhui                       | 2007      | Coal mine area                 | unknown | 73 |
| Shanghai                    | 2007      | Urban area                     | 5–10    | 74 |
| <b>Western China</b>        |           |                                |         |    |
| <i>Rural</i>                |           |                                |         |    |
| Mt. Qomolangma(-)           | 2005      | Urban/Rural <sup>a</sup>       | Unknown | 75 |
| Lanzhou                     | 2006      | Uncultivated/farmland          | 0–10    | 76 |
| Chengdu(+,-)                | 2006      | Unknown                        | 0–20    | 77 |
| East Qingzang Plateau       | 2004/2005 | Rural                          | 0–3     | 78 |
| Guiyang                     | Unknown   | Suburb                         | 0–20    | 79 |
| <i>Urban</i>                |           |                                |         |    |
| Mt. Qomolangma(+)           | 2005      | Urban/Rural <sup>a</sup>       | Unknown | 75 |
| Guiyang                     | Unknown   | Urban                          | 0–20    | 79 |
| <b>Southern China</b>       |           |                                |         |    |
| <i>Rural</i>                |           |                                |         |    |
| Guangzhou                   | 1999/2002 | Vegetable soils                | 0–20    | 80 |
| Guiyu(*)                    | 2004      | Reservoir/rice field           | 0–10    | 81 |
| Shantou(*,+,-)              | 2002      | Suburb                         | 0–20    | 82 |
| Shende                      | 2002      | vegetable/stacked soils        | 0–20    | 83 |

|                           |           |                                 |         |    |
|---------------------------|-----------|---------------------------------|---------|----|
| Dongguan (*,-)            | 2002      | Agricultural soil               | 0–20    | 84 |
| Pearl River Delta         | 2001      | Agricultural soil/ natural soil | 0-15    | 85 |
| Shenzhen                  |           |                                 |         | 86 |
| Huizhou                   | 2004/2005 | urban area                      | 0–20    | 87 |
| Zhanjiang                 | 2004      | urban area                      | 0–20    | 87 |
| <i>Urban</i>              |           |                                 |         |    |
| Guangzhou                 | 1999/2002 | Urban area                      | 0–20    | 80 |
| Guiyu(*)                  | 2004      | E-waste open burning site       | 0–10    | 81 |
| Shantou(*,+,-)            | 2002      | Industrial and urban area       | 0–20    | 82 |
| Dongguan (+)              | 2002      | Agricultural soil <sup>b</sup>  | 0–20    | 84 |
| Guangzhou(*,+)            | 2006      | Industrial/traffic area         | 0–20    | 88 |
| Shenzhen                  |           |                                 |         | 86 |
| <b>Northeastern China</b> |           |                                 |         |    |
| <i>Rural</i>              |           |                                 |         |    |
| Dalian(*,+,-)             | 2005      | Traffic/residential area        | 0–5     | 89 |
| Liaoning (*,-)            | 2005      | Urban/rural area <sup>a</sup>   | 0–5     | 90 |
| <i>Urban</i>              |           |                                 |         |    |
| Dalian(*,+,-)             | 2005      | Suburban/rural area             | 0–5     | 89 |
| Liaoning (+)              | 2005      | Urban/rural area <sup>a</sup>   | 0–5     | 90 |
| <b>Central China</b>      |           |                                 |         |    |
| <i>Rural</i>              |           |                                 |         |    |
| Wuhan                     | 2002      | Vegetable soil                  | unknown | 91 |
| Jiangxi                   |           | Agricultural soil               | 0–20    | 92 |
| <i>Urban</i>              |           |                                 |         |    |

|                |                               |                      |                                 |              |                   |
|----------------|-------------------------------|----------------------|---------------------------------|--------------|-------------------|
| Jiaozuo        |                               | Unknown              | Traffic area                    | 0–10         | 93                |
| Wuhan          |                               | 2002                 | Traffic area                    | unknown      | 91                |
| Zhuzhou        |                               | Unknown              | Urban area                      | 0–15         | 94                |
| <b>Global:</b> |                               |                      |                                 |              |                   |
| <i>Country</i> | <i>Location</i>               | <i>Sampling time</i> | <i>Sampling area</i>            | <i>Depth</i> | <i>References</i> |
| Thailand       | Chiang-Mai                    | 1996                 | Traffic area                    | Unknown      | 95                |
| Thailand       | Bangkok                       | Unknown              | Traffic/industrial/rural area   | 0–5          | 96                |
| South Korea    | South Korea                   | Unknown              | Agriculture area                | Unknown      | 97                |
| South Korea    | Gangwon                       | 2000                 | Forest                          | 0–5          | 98                |
| India          | Agra                          | Unknown              | Industrial/traffic              | 0–6          | 99                |
| India          | Delhi                         | 2006                 | Agriculture area                | 0–5          | 100               |
| India          | Delhi                         | 2006                 | Traffic sites                   | 0–5          | 101               |
| Japan          | Sapporo                       | 1959/2002            | Rural                           | 0–15         | 102               |
| Brazil         | Uberlândia                    | Unknown              | Urban/rural area                | 0–20         | 103               |
| Brazil         | Manaus/ Mata Atlântica        | 1998                 | Ecological zones                | 0–10         | 104               |
| Brazil         | Amazon region                 | Unknown              | Forest                          | 0–10         | 105               |
| Germany        | Stephanskirchen/Bayreuth      | Unknown              | Urban area                      | 0–5          | 105               |
| Germany        | Bonn                          | 1996                 | Rural                           | 0–5          | 106               |
| France         | Luxembourg/Eastern France     | 2001                 | Traffic area                    | 0–3          | 107               |
| France         | Seine River region            | 2000                 | Industrial/urban /rural area    | Unknown      | 108               |
| Spain          | Tarragona County              | 2002                 | Industrial/urban/rural area     | 0–3          | 109               |
| Spain          | Louro                         | 2006                 | Agriculture area                | Unknown      | 110               |
| Spain          | Sevilla                       | Unknown              | Traffic/garden/agriculture area | 0–10         | 111               |
| Spain          | Ebro River Basin              | 2004/2006            | Agriculture area                | 0–10         | 112               |
| UK             | South of the UK               | 1998                 | Rural area                      | 0–5          | 113               |
| Norway         | North of Norway               | 1998                 | Rural area                      | 0–5          | 113               |
| Denmark        | Esbjerg                       | unknown              | Industrial areas/roadside       | 0–5          | 114               |
| Switzerland    | Swiss soil monitoring network | 2002                 | Unknown                         | 0–10         | 115               |

|          |                     |           |                               |         |     |
|----------|---------------------|-----------|-------------------------------|---------|-----|
| Poland   | Holy Cross Mountain | 2000      | Mountain area                 | Unknown | 116 |
| Serbia   | Belgrade            | 2003/2004 | Urban/rural area              | Unknown | 117 |
| Nigeria  | Calabar             | Unknown   | Petroleum handling facilities | 0–15    | 118 |
| USA      | New Orleans         | Unknown   | Industrial area               | Unknown | 119 |
| Portugal | Sado Estuary        | 2006      | Industrial/resident area      | unknown | 120 |
| Italy    | Palermo             | unknow    | natural reserve               | 0–5     | 121 |
| Italy    | Spluga Pass         | 2007      | Rural area                    | 0–1     | 122 |

## Freshwater

### China

| <i>Location</i>                              | <i>Sampling time</i> | <i>Reference</i> |
|----------------------------------------------|----------------------|------------------|
| Qiangtang River (*,+,-)                      | 2005                 | 123              |
| Hangzhou City, China                         | 2002                 | 124              |
| Zhejiang Province (*,+,-)                    | 2005/2006            | 63               |
| Yellow River Delta (*,+,-)                   | 2007                 | 125              |
| Yellow River (%)                             | 2005/2006            | 126              |
| Yellow River                                 | 2007                 | 127              |
| Yellow River                                 | 2005                 | 128              |
| Middle and lower reaches of the Yellow River | 2004                 | 129              |
| Jiulong River Estuary and Western Xiamen Sea | 1999                 | 130              |
| MingJiang River Estuary (*,+,-)              | 1999                 | 64               |
| Yangtze River                                | 2010                 | 131              |
| Yangtze River                                | 2010                 | 132              |
| Huaihe River                                 | 2010                 | 132              |
| Taihu Lake                                   | 2010                 | 132              |
| Daliao River watershed                       | 2005                 | 133              |
| Drinking water resources, Henan              | 2001                 | 134              |
| Tianjin, China(*,+,-)                        | 2002                 | 135              |
| Tonghui River (*,+,-)                        | 2002                 | 136              |

---

|                                    |                               |           |     |
|------------------------------------|-------------------------------|-----------|-----|
| Zhujiang                           |                               | Unknow    | 137 |
| Zhujiang                           |                               | 2005/2006 | 138 |
| Xijiang Guangdong                  |                               | 2003/2004 | 139 |
| Taihu Lake                         |                               | 2010      | 140 |
| Beijing-Hangzhou Grand Canal water |                               | 2009      | 141 |
| Luan River                         |                               | 2009      | 142 |
| Xuanwei                            |                               | 2007      | 143 |
| Fuyuan                             |                               | 2008      |     |
| <b>Global</b>                      |                               |           |     |
| Australia                          | Brisbane River                | 2001/2002 | 144 |
| USA                                | Gulf of Alaska                | 2001      | 145 |
| USA                                | Mississippi River(*)          | 1999      | 146 |
| USA                                | Anacostia River, USA(+/-)     | 2002      | 147 |
| USA                                | Southern Chesapeake bay       | 1994      | 148 |
| USA                                | York River, VA Estuary        | 1998      | 149 |
| USA                                | Susquehanna River (*)         | 2000      | 150 |
| Canada                             | Lake Ontario and Lake Erie(*) | 1994      | 151 |
| France                             | Seine River                   | 1993      | 152 |
| France                             | Rhône River                   | 1994/1995 | 153 |
| France                             | Le Bebec (*,+,-)              | 2002      | 154 |
| France                             | Seine river                   | 2002/2003 | 155 |
| Germany                            | Trier () (*,+/-)              | 1999/2000 | 156 |
| Germany                            | River Elbe(*,+/-)             | 1989/1993 | 157 |
| Italy                              | Venice Lagoon(*)              | 2001/2003 | 158 |
| Spain                              | Llobregat river (*)           | 1994/1995 | 159 |
| Sweden                             | Northern                      | 2005      | 160 |
| Brazil                             | Tripuí River, Ouro Preto, MG, | Unknown   | 161 |
| Kenya                              | Lake Victoria                 | 2006      | 162 |
| Pakistan                           | Chenab River                  | 2007      | 163 |

---

---

## Seawater

### China

| <i>Region</i>    | <i>Location</i>                   | <i>Sampling time</i> | <i>Reference</i> |
|------------------|-----------------------------------|----------------------|------------------|
| South China Sea  | Daya Bay(*,+,-),                  | 1999                 | 164              |
| South China Sea  | Northern South China Sea          | 2002                 | 137              |
| South, China Sea | Lingding Yang,                    | unknown              | 137              |
| South China Sea  | Xiamen Harbor,                    | 2001                 | 165              |
| East China Sea   | Yangtze Estuary and coastal area, | 2006                 | 166              |

### Global:

| <i>Region</i>             | <i>Location</i>                         | <i>Sampling time</i> | <i>Reference</i> |
|---------------------------|-----------------------------------------|----------------------|------------------|
| Red Sea, Indian Ocean     | Gulf of Suez, Egypt                     | 2003                 | 167              |
| Indian Ocean              | Red Sea                                 | 2003                 | 167              |
| Pacific Ocean             | Moreton Bay, Australia                  | 2001/2002            | 144              |
| North Pacific Ocean       | San Francisco Bay(*)                    | 1993-2001            | 168              |
| Pacific Ocean             | Gulf of Mexico(*)                       | 1999                 | 146              |
| North Sea, Atlantic Ocean | Koster Fjord, Sweden                    | 1999/2001            | 169              |
| Atlantic Ocean            | North–South Atlantic Transect           | 2005                 | 170              |
| Atlantic Ocean            | New York–New Jersey Harbor Estuary, USA | 1998                 | 171              |
| Atlantic Ocean            | North Atlantic(*)                       |                      | 172, 173         |
| Baltic Sea                | Baltic Sea (*)                          | 1992/1998            | 174              |
| Baltic Sea                | Baltic Sea (*)                          | 1990/1998            | 175              |
| Mediterranean Sea         | Mediterranean Sea(*)                    | 1986/1990            | 172              |

## Sediment

### China

---

| <i>Location</i> | <i>Sampling time</i> | <i>Reference</i> |
|-----------------|----------------------|------------------|
|-----------------|----------------------|------------------|

---

---

|                                               |           |     |
|-----------------------------------------------|-----------|-----|
| <i>River:</i>                                 |           |     |
| Qiangtang River (*,+,-)                       | 2005      | 123 |
| Middle and lower reaches of the Yellow River  | 2004      | 129 |
| Yellow River                                  | 2005/2006 | 126 |
| Daliao River watershed                        | 2005      | 133 |
| Guiyu                                         | 2006      | 176 |
| Zhujiang                                      | 1997      | 177 |
| Wuhan, Yangtze River                          | 2005      | 178 |
| Tonghui River (*,+,-)                         | 2002      | 136 |
| Mingjiang (*,+,-)                             | 1999      | 64  |
| Yellow River Delta                            | 2007      | 179 |
| LanZhou (*,+,-)                               | 2005      | 180 |
| Zhujiang, Dongjiang, Xijiang (+,-)            | 2002      | 137 |
| Yalujiang                                     | 1994/1996 | 181 |
| Nanguang River                                | 2007      | 182 |
| Love River                                    | 2009      | 183 |
| Canon River                                   | 2009      | 183 |
| Jen-Gen River                                 | 2009      | 183 |
| Salt River                                    | 2009      | 183 |
| Yellow River                                  | 2004      | 184 |
| Yellow River Delta                            | 2007      | 185 |
| Fuhe River                                    | 2008      | 186 |
| Jialu River                                   | 2009      | 187 |
| Danshui River                                 | 2008      | 188 |
| National Nature Reserve in Yellow River Delta | 2009      | 189 |
| Rivers in Fuzhou                              | 2007      | 190 |
| Huaihe River                                  | 2008      | 191 |
| Huaihe River                                  | 2008      | 192 |
| Beijing-Hangzhou Grand Canal water            | 2009      | 141 |
| Luan River                                    | 2009      | 142 |

---

---

|                                                 |                                 |                      |                  |
|-------------------------------------------------|---------------------------------|----------------------|------------------|
| <i>Lake:</i>                                    |                                 |                      |                  |
| Meiliang Bay, Taihu Lake(*,+)                   |                                 | 2003                 | 193              |
| Taihu Lake                                      |                                 | 2000                 | 194              |
| Taihu Lake                                      |                                 | 2009                 | 195              |
| Taihu Lake                                      |                                 | 2009                 | 140              |
| Nansi Lake                                      |                                 | 2001                 | 196              |
| Qinghai Lake                                    |                                 | 2006                 | 197              |
| Bosten Lake                                     |                                 | 2006                 | 197              |
| Sugan Lake                                      |                                 | 2006                 | 197              |
| Erhai Lake                                      |                                 | 2006                 | 197              |
| Chenghai Lake                                   |                                 | 2006                 | 197              |
| Baiyang Dian                                    |                                 | 2007                 | 186              |
| <i>Others</i>                                   |                                 |                      |                  |
| freshwater fishponds in Pearl River Delta       |                                 | 2008-2009            | 198              |
| <br>                                            |                                 |                      |                  |
| <i>Other:</i>                                   |                                 |                      |                  |
| Jiulong River Estuary and Western Xiamen Sea    |                                 | 1999                 | 130              |
| Zhejiang Province (*,+,-)                       |                                 | 2005/2006            | 63               |
| Hangzhou City, China                            |                                 | 2002                 | 124              |
| Reservoirs in Hong Kong Dongguan                |                                 | 2004/2005            | 199              |
| Fishponds of the Pearl River delta, South China |                                 | 2001/2002            | 200              |
| <br>                                            |                                 |                      |                  |
| <b>Global:</b>                                  |                                 |                      |                  |
| <i>Country</i>                                  | <i>Location</i>                 | <i>Sampling time</i> | <i>Reference</i> |
| <i>River</i>                                    |                                 |                      |                  |
| USA                                             | Susquehanna River, (*,+,-)      | 2000                 | 201              |
| USA                                             | Ashtabula River                 | 1998                 | 202              |
| Brazil                                          | Iguaçu River (*,+,-)            | 2005                 | 203              |
| Brazil                                          | Canguiri river sediment (*,+,-) | 2005                 | 203              |

---



|                |                                 |           |     |
|----------------|---------------------------------|-----------|-----|
| India          | River Yamuna,                   | 2003      | 204 |
| Korea          | Hyeongsan River (*)             | 2001      | 205 |
| France         | Seine River                     | 1994      | 206 |
| <i>Lake</i>    |                                 |           |     |
| Germany        | Laguna Lake,                    | Unknown   | 207 |
| Mexico         | Mecoacán Lake Estuarine (*,+,-) | 1993/1996 | 208 |
| Norwegian      | Svalbard (*)                    | 2005      | 209 |
| <i>Estuary</i> |                                 |           |     |
| UK             | Mersey Estuary,                 | 2000/2002 | 210 |
| Nigeria        | Niger Delta,                    | Unknown   | 211 |
| USA            | Boston Harbor                   | 1999      | 212 |
| USA            | Unknown (*)                     | Unknown   | 213 |
| Spain          | Barcelona harbour (Inner)       | Unknown   | 214 |
| India          | Hugli estuary                   | 2003      | 215 |
| Ireland        | Cork Harbour (*)                | Unknown   | 216 |
| <i>Other</i>   |                                 |           |     |
| Jordan         | Karak                           | 1997      | 217 |

### Marine sediment

| <b>China</b>    |                                             |                      |                  |
|-----------------|---------------------------------------------|----------------------|------------------|
| <i>Region</i>   | <i>Location</i>                             | <i>Sampling time</i> | <i>Reference</i> |
| South China Sea | Daya Bay(*,+,-)                             | 1999                 | 164              |
| South China Sea | Lingdingyang/northern South China Sea (+,-) | 2002                 | 137              |
| South China Sea | Lingding Bay                                | 1997                 | 177              |
| South China Sea | Shantou Bay                                 | Unknown              | 218              |
| South China Sea | Western Xiamen Sea                          | 1999                 | 130              |

---

|                 |                                    |           |     |
|-----------------|------------------------------------|-----------|-----|
| South China Sea | Daya Bay (*,+,-)                   | 1999      | 219 |
| South China Sea | Zhelin Bay                         | 2004      | 220 |
| South China Sea | South China Sea                    | 1993      | 221 |
| South China Sea | Harbor Channel, Taiwan             | 2009      | 183 |
| South China Sea | Hongkong                           | 2008      | 222 |
| South China Sea | Harbor Channel, Taiwan             | 2006      | 223 |
| East China Sea  | Yangtze Estuary                    | 1998      | 224 |
| East China Sea  | Yangtze Estuary                    | Unknown   | 225 |
| East China Sea  | Yangtze Estuary                    | 2004      | 184 |
| Bohai sea       | Daliao River Estuary               | 2007      | 226 |
| Bohai Sea       | Yalujiang Estuary                  | 1994/1996 | 181 |
| Bohai Sea       | Bohai Sea                          | 1999      | 227 |
| Bohai Sea       | Liaodong Bay                       | 2007      | 228 |
| Bohai Sea       | Laizhou Bay                        | 2007      | 229 |
| Yellow Sea      | Rizhao                             | 2007      | 230 |
| Yellow Sea      | Qingdao                            | 2007      | 231 |
| <b>Global</b>   |                                    |           |     |
| Atlantic Ocean  | Wadden Sea, Netherlands            | 1998      | 232 |
| Atlantic Ocean  | Dutch North Sea, Netherlands       | 2000      | 233 |
| Atlantic Ocean  | South Carolina, USA                | 1999      | 234 |
| Atlantic Ocean  | Río de la Plata Estuary, Argentina | 2000/2002 | 235 |
| Atlantic Ocean  | Montevideo Harbour, Uruguay        | 1998      | 236 |
| Atlantic Ocean  | Sarasota Bay, Florida, USA(*)      | Unknown   | 237 |
| Adriatic Sea    | Gulf of Trieste, Slovenia          | 1996      | 238 |
| Atlantic Ocean  | São Sebastião, SP, Brazil          | 1999      | 239 |
| Atlantic Ocean  | Patos Lagoon Estuary, Brazil       | 1997      | 240 |
| Atlantic Ocean  | Cotonou, Benin, Nigeria            | Unknown   | 241 |
| Atlantic Ocean  | Aquitaine (France)                 | Unknown   | 241 |

---

---

|                   |                                          |           |     |
|-------------------|------------------------------------------|-----------|-----|
| Atlantic Ocean    | Western Irish Sea                        | 2000      | 242 |
| Pacific Ocean     | Gulf of Alaska                           | Unknown   | 145 |
| Pacific Ocean     | Ariake Sea(*)                            | 1999/2001 | 243 |
| Pacific Ocean     | Western sea coast of South Korea (*,+,-) | 2004      | 244 |
| Pacific Ocean     | Deep Sea                                 | 1992/1993 | 245 |
| Pacific Ocean     | Eastern Gulf of Alaska                   | 1989/1993 | 246 |
| Pacific Ocean     | Todos Santos Bay, Mexico                 | Unknown   | 247 |
| Pacific Ocean     | Northeastern coastal region of Singapore | Unknown   | 248 |
| Mediterranean Sea | Abu Qir Bay, Egypt                       | 2004      | 249 |
| Mediterranean Sea | Marmara Sea, Turkey                      | Unknown   | 250 |
| Mediterranean Sea | Eastern Mediterranean                    | 2001      | 251 |
| Mediterranean sea | Gulf of Fos, France                      | Unknown   | 252 |
| Red Sea           | Suez port                                | 1999      | 253 |
| Gulf of Mexico    | Pensacola Bay, USA (*)                   | Unknown   | 254 |
| Adriatic Sea      | Rovinj area, Croatia                     | Unknown   | 255 |

---

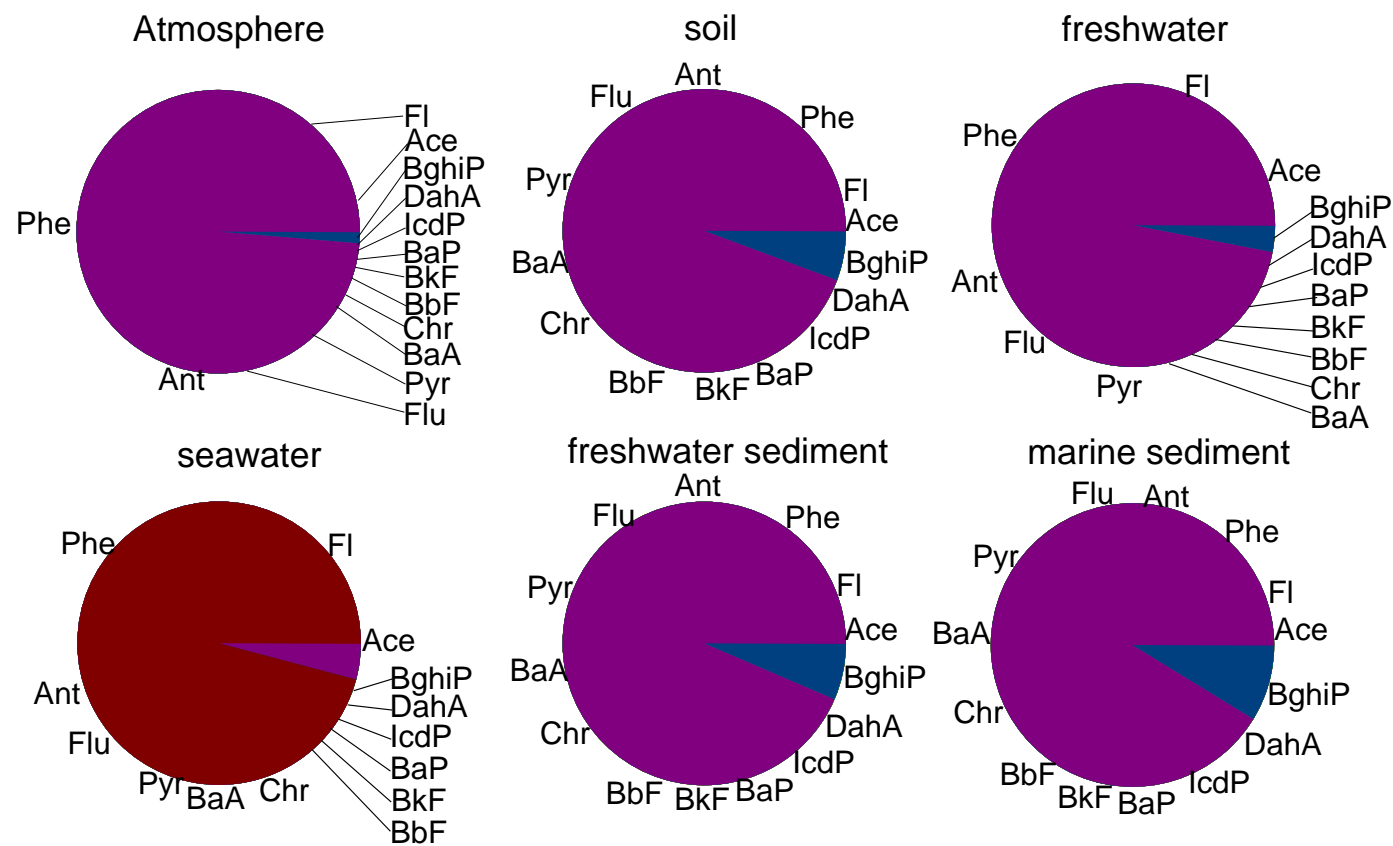

Fig. S1 Share of mass inventory of individual PAH compound in air, soil, freshwater, seawater, freshwater sediment and marine sediment of China, (abbreviation for each compound is listed in Table S1)

**Reference:**

1. Chinese Academy of Sciences, *Science database: natural resources*, <http://www.csdb.cn/>, Accessed July 2007.
2. H. Cheng, *Handbook of natural resources in China*, Sciences Press, Beijing, 1990.
3. S. Tao, Y. N. Liu, W. Xu, C. Lang, S. Z. Liu, H. Dou and W. X. Liu, *Environ. Sci. Tech.*, 2007, **41**, 568–573.
4. H. Lu, L. Zhu and S. Chen, *Environmental Pollution*, 2008, **152**, 569–575.
5. L. Zhu, H. Lu, S. Chen and T. Amagai, *Journal of Hazardous Materials*, 2009, **162**, 1165–1170.
6. L. Zhu and J. Wang, *Chemosphere*, 2003, **50**, 611–618.
7. H. Lu, Zhejiang University, 2008.
8. S. C. Lee, K. F. Ho, L. Y. Z. Chan, Barbara and J. C. Chow, *Atmos. Environ.*, 2001, **35**, 5949–5960.
9. D. W. M. Sin, Y. C. Wong, Y. Y. Choi, C. H. Lam and L. P. K. K., *Journal of Environmental Monitoring*, 2003, **5**, 989–996.
10. H. H. Yang and C. M. Chen, *Chemosphere*, 2004, **56**, 879–887.
11. G. C. Fang, Y. S. Wu, M. H. Chen, T. T. Ho, S. H. Huang and J. Y. Rau, *Atmos. Environ.*, 2004, **38**, 3385–3391.
12. H.-H. Liu, H.-H. Yang, C.-D. Chou, M.-H. Lin and H.-L. Chen, *J. Hazard. Mater.*, 2010, **181**, 105–111.
13. J. Li, G. Zhang, X. D. Li, S. H. QI, G. Q. Liu and X. Z. Peng, *Sci. Total*

- Environ.*, 2006, **355**, 145–155.
14. Y.-Y. Yang, P.-E. Guo, Q. Zhang, D.-L. Li, L. Zhao and D.-H. Mu, *Sci. Total Environ.*, 2010, **408**, 2492–2500.
  15. H. R. Cheng, G. Zhang, X. Liu, J. Li, S. H. Qi and Y. C. Zhao, *China Environmental Science*, 2006, **26**, 646–649.
  16. X. Liu, G. Zhang, J. Li, H. R. Cheng, S. H. Qi, X. D. Li and K. C. Jones, *Journal of Environmental Monitoring*, 2006, **9**, 1092–1098.
  17. X. Liu, Guangzhou institute of geochemistry, 2007.
  18. G.-Q. Liu, Y.-P. Tong, J. H. T. Luong, H. Zhang and H.-B. Sun, *Environ. Monitor. Assess.*, 2010, **163**, 599–606.
  19. W.-T. Wang, S. Simonich, B. Giri, Y. Chang, Y.-G. Zhang, Y.-L. Jia, S. Tao, R. Wang, B. Wang, W. Li, J. Cao and X.-X. Lu, *Sci. Total Environ.*, 2011, **409**, 2942–2950.
  20. J.-P. Zhao, F.-W. Zhang, J.-S. Chen and Y. Xu, *Journal of Environmental Sciences-China*, 2010, **22**, 1014–1022.
  21. W.-L. Ma, Y.-F. Li, H. Qi, D.-Z. Sun, L.-Y. Liu and D.-G. Wang, *Chemosphere*, 2010, **79**, 441–447.
  22. Y. Sun, Liaoning Normal University, 2010.
  23. L. Zhu, Y. Takahashi, T. Amagai and H. Matsushita, *Talanta*, 1997, **45**, 113–118.
  24. T. Ohura, T. Amagai, M. Fusaya and H. Matsushita, *Environmental Science & Technology*, 2004, **38**, 49–55.

25. J. He and R. Balasubramanian, *Atmos. Environ.*, 2009, **43**, 4375–4383.
26. F. Halek, M. Kianpour-rad and A. Kavousi, *Environmental Chemistry Letters*, 2010, **8**, 39–44.
27. M. Krauss, W. Wilcke, C. Martius, A. G. Bandeira, M. V. B. Garcia and W. Amelung, *Environ. Pollut.*, 2005, **135**, 143–154.
28. G. L. Ströher, N. R. Poppi, J. J. L. Raposo and J. B. Gomes de Souza, *Microchemical Journal*, 2007, **86**, 112–118.
29. N. Poor, R. Tremblay, H. Kay, V. Bhethanabotla, E. Swartz, M. Luther and S. Campbell, *Atmos. Environ.*, 2004, **38**, 6005–6015.
30. J. E. Baker and S. J. Eisenreich, *Environ. Sci. Tech.*, 1990, **24**, 342–352.
31. M. F. Simcik, T. P. Franz, H. Zhang and S. J. Eisenreich, 1998, **32**, 251–257.
32. M. Odabasi, N. Vardar, A. Sofuoglu, Y. Tasdemir and T. M. Holsen, *The Science of The Total Environment*, 1999, **227**, 57–67.
33. E. Swartz, L. Stockburger and D. A. Vallero, 2003, **37**, 3537–3546.
34. C. L. Gigliotti, J. Dachs, E. D. Nelson, P. A. Brunciak and S. J. Eisenreich, 2000, **34**, 3547–3554.
35. M. C. H. Lim, G. A. Ayoko and L. Morawska, *Atmospheric Environment*, 2005, **39**, 463–476.
36. M. E. Bartkow, J. N. Huckins and J. F. Müller, *Atmospheric Environment*, 2004, **38**, 5983–5990.

37. J. F. Müller, D. W. Hawker and D. W. Connell, *Chemosphere*, 1998, **37**, 1369–1383.
38. Y. Su, Y. D. Lei, F. Wania, M. Shoeib and T. Harner, *Environmental Science & Technology*, 2006, **40**, 3558–3564.
39. C. J. Halsall, L. A. Barrie, P. Fellin, D. C. G. Muir, B. N. Billeck, L. Lockhart, F. Y. Rovinsky, E. Y. Kononov and B. Pastukhov, *Environmental Science & Technology*, 1997, **31**, 3593–3599.
40. C. Vasilakos, N. Levi, T. Maggos, J. Hatzianestis, J. Michopoulos and C. Helmis, *Journal of Hazardous Materials*, 2007, **140**, 45–51.
41. P. Gustafson, C. Östman and G. Sällsten, 2008, **42**, 5074–5080.
42. R. G. M. Lee, H. Hung, D. Mackay and K. C. Jones, *Environ. Sci. Tech.*, 1998, **32**, 2172–2179.
43. M. Dimashki, L. H. Lim, R. M. Harrison and S. Harrad, *Environmental Science & Technology*, 2001, **35**, 2264–2267.
44. C. J. Halsall, P. J. Coleman, B. J. Davis, V. Burnett, K. S. Waterhouse, P. Harding-Jones and K. C. Jones, *Environmental Science & Technology*, 1994, **28**, 2380–2386.
45. K. Ravindra, L. Bencsa, E. Wauters, J. de Hoog, F. Deutsch, E. Roekens, N. Bleux, P. Berghmans and R. Van Grieken, *Atmos. Environ.*, 2006, **40**, 771–785.
46. S. Pérez, J. Dachs and D. Barceló, *Environmental Science & Technology*, 2003, **37**, 3794–3802.



47. E. Demircioglu, A. Sofuoglu and M. Odabasi, *Clean-Soil Air Water*, 2011, **39**, 319–327.
48. Y. Tasdemir and F. Esen, *Atmospheric Research*, 2007, **84**, 1–12.
49. M. Akyüz and H. Çabuk, *Sci. Total Environ.*, 2010, **408**, 5550–5558.
50. G. Lammel, J. Klánová, P. Ilić, J. Kohoutek, B. Gasić, I. Kovacić, N. Lakić and R. Radić, *Atmos. Environ.*, 2010, **44**, 5015–5021.
51. M. Tsapakis and E. G. Stephanou, *Environ. Sci. Tech.*, 2005, **39**, 6584–6659.
52. X. Ding, X.-M. Wang, Z.-Q. Xie, C.-H. Xiang, B.-X. Mai, L.-G. Sun, M. Zheng, G.-Y. Sheng, J.-M. Fu and U. P 蝠 chl, *Atmos. Environ.*, 2007, **41**, 2061–2072.
53. F. M. Jaward, J. L. Barber, K. Booij and K. C. Jones, *Environmental Pollution*, 2004, **132**, 173–181.
54. K.-Y. Wang, Y.-T. Shen, S.-C. Zhang, Y.-B. Ye, Q. Shen, J.-D. Hu and X.-J. Wang, *Environmental Geology*, 2009, **56**, 1041–1050.
55. Y. Cheng, C.-X. Wang, Z.-J. Wang and S.-B. Huang, *Plant and soil*, 2004, **261**, 189–196.
56. S. Tao, Y. H. Cui, F. L. Xu, B. G. Li, J. Cao, W. X. Liu, G. Schmitt, X. J. Wang, W. R. Shen, B. P. Qing and R. Sun, *The Science of the Total Environment* 2004, **320**, 11–24.
57. Q. Zuo, W.-X. Liu, S. Tao, J.-F. Wang, Y. Gao and Z.-F. Tian, *Acta Scientiae Circumstantiae*, 2007, **27**, 667–671.

58. Y. C. Wang, M. Qiao, Y. X. Liu, H. P. H. Arp and Y. G. Zhu, *J. Environ. Monit.*, 2011, **13**, 433–439.
59. S.-D. Liu, X.-H. Xia, L.-Y. Yang, M.-H. Shen and R.-M. Liu, *J. Hazard. Mater.*, 2010, **177**, 1085–1092.
60. F. Liu, Y.-H. Liu, J.-W. Wang, H.-F. Nie, S. Fu and C.-D. Zhao, *Earth Science Frontiers*, 2008, **15**, 155–160.
61. F.-M. Li, S.-H. Guo, B. Wu and H.-F. Ye, *Chinese Geographical Science*, 2011, **21**, 185–194.
62. W.-T. Wang, S. L. M. Simonich, M. Xue, J.-Y. Zhao, N. Zhang, R. Wang, J. Cao and S. Tao, *Environ. Pollut.*, 2010, **158**, 1245–1251.
63. L. Zhu, Y. Chen and R. Zhou, *Journal of Hazardous Materials*, 2008, **150**, 308–316.
64. Z. L. Zhang, H. S. Hong, J. L. Zhou and G. Yu, *The Science of the Total Environment*, 2004, **323**, 71–86.
65. W. Q. Xing, Y. M. Luo, L. H. Wu, J. Song, W. Qian and P. Christie, *Environmental Geochemistry and Health*, 2006, **28**, 89–96.
66. A.-F. Ding, Nanjing Agricultural University, 2007.
67. Q.-H. Zhang, Y.-Y. Shi, D. Li, G. Xu and Q. Zhong, *The Administration and Technique of Environmental Monitoring*, 2007, **19**, 22–24.
68. Y.-F. Jiang, X.-T. Wang, M.-H. Wu, G.-Y. Sheng and J.-M. Fu, *Environ. Monitor. Assess.*, 2011, **183**, 139–150.
69. K.-X. Zhang, Dalian University of Technology, 2011.

70. L. F. Ping, Y. M. Luo, H. B. Zhang, Q. B. Li and L. H. Wu, *Environ. Pollut.*, 2007, **147**, 358–365.
71. F. Yu and Y. S. Lin, *Ecology and Environment (in Chinese)*, 2005, **14**, 6–9.
72. X.-L. Ge, J.-Y. Yan, X.-C. Jiao, X. Yuan and S.-G. Luo, *Geophysical & geochemical exploration*, 2008, **32**, 622–626.
73. R.-W. Wang, G.-J. Liu, C.-L. Chou, J.-J. Liu and J.-M. Zhang, *Archives of Environmental Contamination and Toxicology*, 2010, **59**.
74. Y. Liu, L. Chen, J.-F. Zhao, Y.-P. Wei, Z.-Y. Pan, X.-Z. Meng, Q.-H. Huang and W.-Y. Li, *Org. Geochem.*, 2010, **41**, 355–362.
75. X.-P. Wang, T.-D. Yao, Z.-Y. Cong, X.-L. Yan, S.-C. Kang and Y. Zhang, *Chinese Science Bulletin*, 2007, **52**, 1405–1413.
76. G. Chen, J. Qin, D.-Z. Shi, Y.-M. Zhang and W.-H. Ji, *Environmental Management*, 2009, DOI: [10.1007/s00267-008-9268-2](https://doi.org/10.1007/s00267-008-9268-2).
77. Y. Gao, S.-H. Qi, X.-L. Xing, K. Zhang, D. Yang, F. Tian and Y. Zhang, *Safety and Environmental Engineering*, 2009, **16**, 11–14.
78. N. Sun, C.-G. Lu, X. Gao, C.-L. Li and L.-M. Chen, *Environmental Science*, 2007, **28**, 664–668.
79. J. Hu, Institute of Geochemistry Chinese Academy of Sciences, 2005.
80. L. G. Chen, Y. Ran, B. S. M. Xing, Bi Xian, J. H. He, X. G. Wei, J. M. Fu and G. Y. Sheng, *Chemosphere*, 2005, **60**, 879–890.
81. X. Z. Yu, Y. Gao, S. C. Wu, H. B. Zhang, K. C. Cheung and M. H. Wong,

- Chemosphere*, 2006, **65** 1500–1509.
82. R. Hao, H.-F. Wan, Y.-T. Song, H. Jiang and S.-L. Peng, *Pedosphere*, 2007, **17**, 673–680.
83. Y. T. Li, F. B. Li, J. J. Chen, G. Y. Yang, H. F. Wan, T. Bin Zhang, X. D. Zeng and J. M. Liu, *Environ. Monitor. Assess.*, 2008, **139**, 61–76.
84. T. B. Zhang, G. Y. Yang, H. F. Wan, Y. Rao, Y. X. Gao and Y. S. Xia, *Soil (in Chinese)*, 2005, **37**, 265–271.
85. G.-Q. Liu, L.-L. Yu, J. Li, X. Liu and G. Zhang, *Environ. Monitor. Assess.*, 2011, **173**, 861–870.
86. S.-P. Cao, H.-G. Ni, P.-H. Qin and H. Zeng, *J. Environ. Monit.*, 2010, **12**, 1445–1450.
87. J. Ma and Y.-Z. Zhou, *Journal of Environmental Sciences-China*, 2011, **23**, 1518–1523.
88. X.-H. Yang, S.-Y. Li, L. Li, W.-H. Tang and X.-F. Huang, *Acta Scientiarum Naturalium Universitatis Sunyatseni*, 2008, **47**, 93–97.
89. Z. Wang, J. W. Chen, X. L. Qiao, P. Yang, F. L. Tian and L. P. Huang, *Chemosphere*, 2007, **68**, 965–971.
90. Z. Wang, Dalian University of Technology, 2007.
91. M. Y. Liu and W. M. Zhang, *Environmental Monitoring in China (in Chinese)*, 2006, **22**, 74–76.
92. X. Gong, Nanchang University, 2010.

93. Z.-H. Yuan, H.-B. Song and Z.-H. Wu, *Environmental Science and management*, 2008, **33**, 51–54.
94. D. L. Tian, W. D. Yan, W. X. Kang, W. H. Xiang and Y. J. Pan, *Scientific Silvae Sinicae (in Chinese)*, 2006, **42**, 12–16.
95. T. Amagai, Y. Takahashi, H. Matsushita, D. Morknoy, P. Sukasem and M. Tabucanon, *Environ. Int.*, 1999, **25**, 563–572.
96. W. Wilcke, S. Müller, N. Kanchanakool, C. Niamskul and W. Zech, *Geoderma*, 1999, **91**, 297–309.
97. J. J. Nam, B. H. Song, K. C. Eom, S. H. Lee and A. Smith, *Chemosphere*, 2003, **50**, 1281–1289.
98. E. J. Kim, S.-D. Choi and Y.-S. Chang, *Env. Sci. Pollut. Res.*, 2011, **18**, 1508–1517.
99. A. Masih and A. Taneja, *Chemosphere*, 2006, **65**, 449–456.
100. T. Agarwal, P. S. Khillare, V. Shridhar and S. Ray, *Journal of Hazardous Materials*, 2009, **163**, 1033–1039.
101. T. Agarwal, *J. Hazard. Mater.*, 2009, **171**, 894–900.
102. K. Honda, M. Mizukami, Y. Ueda, N. Hamada and N. Seike, *Chemosphere*, 2007, **68**, 1763–1771.
103. W. Wilcke, J. Lilienfein, S. d. C. Lima and W. Zech, *Journal of Plant Nutrition and Soil Science*, 1999, **162**, 539–548.
104. W. Wilcke, W. Amelung, M. Krauss, C. Martius, A. Bandeira and M. Garcia, *Org. Geochem.*, 2003, **34**, 1405–1417.

105. W. Wilcke, M. Krauss and W. Amelung, *Environ. Sci. Technol.*, 2002, **36**, 3530–3535.
106. I. Atanassova and G. W. Brümmer, *Geoderma*, 2004, **120**, 27–34.
107. C. Crepineau, G. Rychen, C. Feidt, Y. Le Roux, E. Lichtfouse and F. Laurent, *J. Agric. Food Chem.*, 2003, **51**, 4841–4845.
108. A. Motelay-Massei, D. Ollivon, B. Garban, M. J. Teil, M. Blanchard and M. Chevreuil, *Chemosphere*, 2004, **55**, 555–565.
109. M. Nadal, M. Schuhmacher and J. L. Domingo, *Chemosphere*, 2007, **66**, 267–276.
110. M. T. Pena, M. C. Casais, M. C. Mejuto and R. Cela, *J. Chromatogr. A*, 2007, **1165**, 32–38.
111. E. Morillo, A. S. Romero, L. Madrid, J. Villaverde and C. Maqueda, *Water Air and Soil Pollution*, 2008, **187**, 41–51.
112. A. Hildebrandt, S. Lacorte and D. Barcelo, *Archives of Environmental Contamination and Toxicology*, 2009, **57**, 247–255.
113. J. J. Nam, G. O. Thomas, F. M. Jaward, E. Steinnes, O. Gustafsson and K. C. Jones, *Chemosphere*, 2008, **70**, 1596–1602.
114. D. K. Essumang, K. Kowalski and E. G. Sogaard, *Bull. Environ. Contam. Toxicol.*, 2011, **86**, 438–443.
115. T. D. Bucheli, F. Blum, A. Desaulles and Ö. Gustafsson, *Chemosphere*, 2004, **56**, 1061–1076.
116. Z. M. Migaszewski, A. Galuszka and P. Paslawski, *Environ. Int.*, 2002, **28**,

303–313.

117. D. Crnković, M. Ristić, A. Jovanović and D. Antonović, *Environ. Monitor. Assess.*, 2007, **125**, 75–83.
118. T. N. Nganjie, A. E. Edet and S. J. Ekwere, *Environ. Monitor. Assess.*, 2007, **130**, 27–34.
119. H. W. Mielke, G. Wang, C. R. Gonzales, B. Le, V. N. Quach and P. W. Mielke, *Sci. Total Environ.*, 2001, **281**, 217–227.
120. J. Lobo, P. M. Costa, S. Caeiro, M. Martins, A. M. Ferreira, M. Caetano, R. Cesario, C. Vale and M. H. Costa, *Ecotoxicology*, 2010, **19**, 1496–1512.
121. S. Orecchio, *J. Hazard. Mater.*, 2010, **173**, 358–368.
122. P. Tremolada, M. Parolini, A. Binelli, C. Ballabio, R. Comolli and A. Provini, *Sci. Total Environ.*, 2009, **407**, 4269–4277.
123. Y. Y. Chen, L. Z. Zhu and R. B. Zhou, *J. Hazard. Mater.*, 2006, **1143**, 207–214.
124. B.-L. Chen, X.-D. Xuan, L.-Z. Zhu, J. Wang, Y.-Z. Gao, K. Yang, X.-Y. Shen and B.-F. Lou, *Water Research*, 2004, **38**, 3558–3568.
125. L. L. Wang, Z. F. Yang, J. F. Niu and J. Y. Wang, *Journal of Hazardous Materials*, **In Press, Corrected Proof**.
126. J. H. Sun, G. L. Wang, Y. Chai, G. Zhang, J. Li and J. L. Feng, *Ecotoxicology and Environmental Safety*, 2009, **72**, 1614–1624.
127. L.-L. Wang, Z.-F. Yang, J.-F. Niu and J.-Y. Wang, *J. Hazard. Mater.*,

- 2009, **169**, 460–465.
128. J.-H. Sun, G.-L. Wang, Y. Chai, G. Zhang, J. Li and J.-L. Feng, *Ecotoxicol. Environ. Saf.*, 2009, **72**, 1614–1624.
129. G. C. Li, X. H. Xia, Z. Yang, R. Wang and N. Voulvoulis, *Environ. Pollut.*, 2006, **144**, 985–993.
130. K. Maskaoui, J. L. Zhou, H. S. Hong and Z. L. Zhang, *Environmental Pollution*, 2002, **118**, 109–122.
131. L.-F. Zhang, L. Dong, L.-J. Ren, S.-X. Shi, L. Zhou, T. Zhang and Y.-R. Huang, *Journal of Environmental Sciences-China*, 2012, **24**, 335–342.
132. W. Shi, F.-X. Zhang, X.-W. Zhang, G.-Y. Su, S. Wei, H.-L. Liu, S.-P. Cheng and H.-X. Yu, *Ecotoxicology*, 2011, **20**, 1099–1106.
133. W. Guo, M. C. He, Z. F. Yang, C. Y. Lin, X. C. Quan and H. Z. Wang, *Chemosphere*, 2007, **68**, 93–104.
134. Y.-G. Ma, J.-P. Cheng, F. Jiao, K.-X. Duo, Z. Rong, m. Li and W.-H. Wang, *Environmental Monitoring and Assessment*, 2008, **146**, 127–138.
135. Z. H. Cao, Y. Q. Wang, Y. M. Ma, Z. Xu, G. L. Shi, Y. Y. Zhuang and T. Zhu, *J. Hazard. Mater.*, 2005, **A122**, 51–59.
136. Z. L. Zhang, J. Huang, G. Yu and H. S. Hong, *Environ. Pollut.*, 2004, **130**, 249–261.
137. X. J. Luo, Guanzhou Institute of Geochemistry, 2004.
138. J.-Z. Wang, Y.-F. Guan, H.-G. Ni, X.-L. Luo and E. Y. Zeng, *Environ. Sci. Tech.*, 2007, **41**, 5614–5619.



139. H.-M. Deng, P.-A. Peng, W.-L. Huang and J.-Z. Song, *Chemosphere*, 2006, **64**, 1401–1411.
140. Y. Zhang, Y. Lu, J. Xu, T. Yu and W.-Y. Zhao, *Bull. Environ. Contam. Toxicol.*, 2011, **87**, 80–85.
141. X. Zheng, China University of Mining and Technology, 2010.
142. Z.-G. Cao, Beijing Normal University, 2010.
143. J.-G. Lv, R.-J. Xu, Q.-H. Zhang, J.-Y. Liu, C.-Y. Liao and F.-S. Wei, *Chin. Sci. Bull.*, 2009, **54**, 3528–3535.
144. M. Shaw, I. R. Tibbetts and J. F. Müller, *Chemosphere*, 2004, **56**, 237–246.
145. J. W. Short, J. J. Kolak, J. R. Payne and G. K. Van Kooten, *Org. Geochem.*, 2007, **38**, 643–670.
146. S. Mitra and T. S. Bianchi, *Mar. Chem.*, 2003, **82**, 273–288.
147. H. M. Hwang and G. D. Foster, *Environ. Pollut.*, 2006, **140**, 416–426.
148. K. E. Gustafson and R. M. Dickhut, *Environ. Toxicol. Chem.*, 1997, **16**, 452–461.
149. R. E. Countway, R. M. Dickhut and E. A. Canuel, *Org. Geochem.*, 2003, **34**, 209–224.
150. F.-C. Ko and J. E. Baker, *Mar. Pollut. Bull.*, 2004, **48**, 840–851.
151. G. Michor, J. Carron, S. Bruce and D. A. Cancilla, *Journal of Chromatography A*, 1996, **732**, 85–99.

152. M. B. Fernandes, M. A. Sicre, A. Boireau and J. Tronczynski, *Mar. Pollut. Bull.*, 1997, **34**, 857–867
153. M.-A. Sicre, M. B. Fernandes and D. Pont, *Marine Pollution Bulletin*, 2008, **56**, 1935–1942.
154. A. Mouhri, A. Motelay-massei, N. Massei, M. Fournier and B. Laignel, *Chemosphere*, 2008, **73**, 443–450.
155. A. Motelay-Massei, B. Garbon, K. Tiphagne-larcher, M. Chevereuil and D. Ollivon, *Water Research*, 2006, **40**, 1995–2006.
156. C. De Rossi, R. Bierl and J. Riefstahl, *Physics and Chemistry of the Earth, Parts A/B/C*, 2003, **28**, 307–314.
157. R. B. Götz, O. H., P. Friesel and K. Roch, *Chemosphere*, 1998, **36**, 2103–2118.
158. L. Manodori, A. Gambaro, R. Piazza, S. Ferrari, A. M. Stortini, I. Moret and G. Capodaglio, *Mar. Pollut. Bull.*, 2006, **52**, 184–192.
159. M. A. Olivella, T. G. Ribalta, A. R. de Febrer, J. M. Mollet and F. X. C. de las Heras, *Science of The Total Environment*, 2006, **355**, 156–166.
160. K. Karlsson and M. Viklander, *Water, Air, & Soil Pollution*, 2007, **188**, 271–282.
161. D. M. Brum and A. D. P. Netto, *Journal of Hazardous Materials*, 2009, **165**, 447–453.
162. B. O. Kwach and J. O. Lalah, *Bull. Environ. Contam. Toxicol.*, 2009, **83**, 727–733.

163. S. Farooq, S. A.-M.-A.-S. Eqani, R. N. Malik, A. Katsoyiannis, G. Zhang, Y.-L. Zhang, J. Li, X. Liu, K. C. Jones and Z. K. Shinwari, *J. Environ. Monit.*, 2011, **13**, 3207–3215.
164. J. L. Zhou and K. Maskaoui, *Environ. Pollut.*, 2003, **121**, 269–281.
165. Y. Tian, T.-L. Zheng and X.-H. Wang, *Acta Science Circumstantiae*, 2004, **24**, 50–55.
166. D.-N. Ou, East China Normal University, 2007.
167. T. O. Said and M. A. Hamed, *Bulletin of Environmental Contamination and Toxicology*, 2006, **77**, 126–136.
168. B. K. Greenfield and J. A. Davis, *Chemosphere*, 2005, **60**, 515–530.
169. A. Palm, I. Cousins, Ö. Gustafsson, J. Axelman, K. Grunder, D. Broman and E. Brorström-Lundén, *Environ. Pollut.*, 2004, **128**, 85–97.
170. L. Nizzetto, R. Lohmann, R. Gioia, A. Jahnke, C. Temme, J. Dachs, P. Herckes, A. D. Guardo and K. C. Jones, *Environmental science & technology*, 2008, **42**, 1580–1585.
171. C. Gigliotti, P. A. Brunciak, J. Dachs, T. R. Glenniv, E. D. Nelson, L. A. Totten and S. J. Eisenreich, *Environ. Toxicol. Chem.*, 2002, **21**, 235–244.
172. E. Lipiatou, I. Tolosa, R. Simo, I. Bouloubassi, J. Dachs, S. Marti, M.-A. Sicre, J. M. Bayona, J. O. Grimalt, A. Saliott and J. Albaiges, *Deep-Sea Research*, 1997, **44**, 881–905.
173. E. Lipiatou and A. Saliot, *Mar. Chem.*, 1991, **32**, 51–71.
174. G. Witt, *Mar. Chem.*, 2002, **79**, 49–66.

175. G. Witt and W. Matthäus, *Marine Chemistry*, 2001, **74**, 279–301.
176. F. Wang, A. O. W. Leung, S. C. Wu, M. S. Yang and M. H. Wong, *Environmental Pollution*, 2009, **157**, 2082–2090.
177. B.-X. Mai, J.-M. Fu, G.-Y. Sheng, K. Y. Hui, Z. Lin, G. Zhang, Y.-S. Min and E. Y. Zeng, *Environ. Pollut.*, 2002, **117**, 457–474.
178. C.-L. Feng, X.-H. Xia, Z.-Y. Shen and Z. Zhou, *Environmental Monitoring and Assessment*, 2007, **133**, 447–458.
179. Z.-F. Yang, L.-L. Wang, J.-F. Niu, J.-Y. Wang and Z.-Y. Shen, *Environmental Monitoring and Assessment*, 2008, **DOI: 10.1007/s10661-008-0603-0**.
180. Y. Yu, J. Xu, P. Wang, H.-W. Sun and S.-G. Dai, *Journal of Hazardous Materials*, 2009, **165**, 494–500.
181. Y. Wu, J. Zhang and Z. Zhu, *Mar. Pollut. Bull.*, 2003, **46**, 619–625.
182. L. Chen, C.-N. Yu, C.-D. Shen, C.-k. Zhang, L. Liu, K.-L. Shen, X.-J. Tang and Y.-X. Chen, *Journal of Soils and Sediments*, 2010, **10**, 359–367.
183. C.-W. Chen, C.-F. Chen, C.-D. Dong and Y.-T. Tu, *J. Environ. Monit.*, 2012, **14**, 105–115.
184. Y.-M. Hui, M.-H. Zheng, Z.-T. Liu and L.-R. Gao, *J. Environ. Sci.*, 2009, **21**, 1625–1631.
185. Z.-F. Yang, L.-L. Wang, J.-F. Niu, J.-Y. Wang and Z.-Y. Shen, *Environ. Monitor. Assess.*, 2009, **158**, 561–571.
186. G.-C. Hu, X.-J. Luo, F.-C. Li, J.-Y. Dai, J.-y. Guo, S.-J. Chen, C. Hong,

- B.-X. Mai and M.-Q. Xu, *J. Environ. Sci.*, 2010, **22**, 176–183.
187. J. Fu, S. Sheng, T. Wen, Z.-M. Zhang, Q. Wang, Q.-X. Hu, Q.-S. Li, S.-Q. An and H.-L. Zhu, *Ecotoxicology*, 2011, **20**, 940–950.
188. C.-C. Hung, G.-C. Gong, F.-C. Ko, H.-Y. Chen, M.-L. Hsu, J.-M. Wu, S.-C. Peng, F.-H. Nan, K. M. Yeager and P. H. Santschi, *Mar. Pollut. Bull.*, 2010, **60**, 1010–1017.
189. C.-Y. Wang, W.-C. Wang, S.-J. He, J.-G. Du and Z.-G. Sun, *Appl. Geochem.*, 2011, **26**, 1330–1336.
190. W.-F. Chen, J.-Z. Ni, H.-Y. Yang, R. Wei, H.-L. Hong and Y.-S. Yang, *China Environmental Science*, 2010, **30**, 1670–1677.
191. J. Fu, Nanjing University, 2011.
192. C.-P. Zhao, Anhui University, 2010.
193. M. Qiao, C.-X. Wang, S.-B. Huang, D.-H. Wang and Z.-J. Wang, *Environment International*, 2006, **32**, 28–33.
194. W. C. Qu, D. Mike and X. Fan, *Hydrobiologia*, 2002, **485**, 163–171.
195. Y.-Q. Tao, S.-C. Yao, B. Xue, J.-C. Deng, X.-L. Wang, M.-H. Feng and W.-P. Hu, *J. Environ. Monit.*, 2010, **12**, 2282–2289.
196. H.-L. Li, H. Gao, C. Zhu, G.-G. Li, F. Yang, Z.-Y. Gong and J. Lian, *Environmental Monitoring and Assessment*, 2009, **DOI: 10.1007/s10661-009-0752-9**.
197. J.-Y. Guo, F.-C. Wu, X.-J. Luo, Z. Liang, H.-Q. Liao, R.-Y. Zhang, W. Li, X.-L. Zhao, S.-J. Chen and B.-X. Mai, *Environ. Pollut.*, 2010, **158**,

2175–2180.

198. H.-S. Wang, Z. Cheng, P. Liang, D.-D. Shao, Y. Kang, S.-C. Wu, C. K. C. Wong and M. H. Wong, *Ecotoxicol. Environ. Saf.*, 2010, **73**, 900–906.
199. Y. Liang, P. K. Fung, M. F. Tse, H. C. Hong and M. H. Wong, *Environmental Monitoring and Assessment*, 2008, **146**, 41–50.
200. K. Y. Kong, K. C. Cheung, C. K. C. Wong and M. H. Wong, *Water Research*, 2005, **39**, 1831–1843.
201. F.-C. Ko, J. Baker, M.-D. Fang and C.-L. Lee, *Chemosphere*, 2007, **66**, 277–285.
202. E. R. Christensen and P. A. Bzdusek, *Water Research*, 2005, **39**, 511–524.
203. N. F. Leite, P. Peralta-Zamora and M. T. Grassi, *Journal of Chromatography A*, 2008, **1192**, 273–281.
204. T. Agarwal, P. S. Khillare and V. Shridhar, *Environmental Monitoring and Assessment*, 2006, **123**, 151–166.
205. C. H. Koh, J. S. Khim, K. Kannan, D. L. Villeneuve, K. Senthilkumar and J. P. Giesy, *Environmental Pollution*, 2004, **132**, 489–501.
206. D. Ollivon, B. Garban, M. Blanchard, M. J. Teil, A. M. Carru, C. Chesterikoff and M. Chevreuil, *Water, Air, & Soil Pollution*, 2002, **134**, 57–79.
207. A. V. Hallare, T. Kosmehl, T. Schulze, H. Hollert, H. R. Köhler and R. Triebkorn, *Science of The Total Environment*, 2005, **347**, 254–271.
208. G. Arteaga-Armenta and M. P. Elizalde-González, *Journal of Soil &*

- Sediment*, 2003, **3**, 35–40.
209. L. Jiao, G. J. Zheng, T. B. Minh, B. Richardson, L. Chen, Y. Zhang, L. W. Yeung, J. C. W. Lam, X. Yang, P. K. S. Lam and M. H. Wong, *Environmental Pollution*, 2009, **157**, 1342–1351.
210. C. H. Vane, I. Harrison and A. W. Kim, *Sci. Total Environ.*, 2007, **in press**.
211. A. A. Olajire, R. Altenburger, E. Küster and W. Brack, *Sci. Total Environ.*, 2005, **340**, 123–136.
212. X.-C. Wang, Y.-X. Zhang and R. F. Chen, *Marine Pollution Bulletin*, 2001, **42**, 1139–1149.
213. M. Kim, M. C. Kennicutt II and Y. Qian, *Science of The Total Environment*, 2008, **389**, 367–377.
214. X. Martínez-Lladó, O. Gibert, V. Martí, S. Díez, J. Romo, J. M. Bayona and J. De Pablo, *Environ. Pollut.*, 2007, **149**, 104–113.
215. L. Guzzella, Roscioli C., L. Viganò, M. Saha, S. K. Sarkar and A. Bhattachary, *Environment International*, 2005, **31**, 523–534.
216. M. Kilemade, M. G. J. Hartl, D. Sheehan, C. Mothersill, F. N. A. M. van Pelt, N. M. O'Brien and J. O'Halloran, *Mar. Pollut. Bull.*, 2004, **49**, 1084–1096.
217. A. Jiries, H. Hussain and J. Lintelmann, *Water, Air, & Soil Pollution*, 2000, **121**, 217–228.
218. K. Maskaoui and Z. Hu, *Bulletin of Environmental Contamination and*

- Toxicology*, 2009, **82**, 172–178.
219. K. Maskaoui, Z. Hu, J.-L. Zhou and Y.-L. Han, *Chinese Journal of Oceanology and Limnology*, 2007, **25**, 166–173.
220. Q.-X. Dong, H. Huang and C.-J. Huang, *Acta Oceanologica Sinica*, 2007, **26**, 123–132.
221. G.-P. Yang, *Environ. Pollut.*, 2000, **108**, 163–171.
222. H.-S. Wang, P. Liang, Y. Kang, D.-D. Shao, G. J. Zheng, S.-C. Wu, C. K. C. Wong and M. H. Wong, *Environ. Pollut.*, 2010, **158**, 3298–3308.
223. C.-W. Chen and C.-F. Chen, *Mar. Pollut. Bull.*, 2011, **63**, 417–423.
224. S.-Y. Xu, X.-J. Gao, M. Liu and Z.-L. Chen, *Geomorphology*, 2001, **41**, 207–217.
225. I. Bouloubassi, J. Fillaux and A. Stliot, *Mar. Pollut. Bull.*, 2001, **42**, 1335–1346.
226. B. Men, M. He, L. Tan, C. Lin and X. Quan, *Marine Pollution Bulletin*, 2009, **58**, 818–826.
227. W. X. Liu, J. L. Chen, X. M. Lin and S. Tao, *Mar. Pollut. Bull.*, 2007, **54**, 97–116.
228. N.-J. Hu, X.-F. Shi, P. Huang, J. Mao, J.-H. Liu, Y. Liu and D.-Y. Ma, *Env. Sci. Pollut. Res.*, 2011, **18**, 163–172.
229. N.-J. Hu, X.-F. Shi, P. Huang and J.-H. Liu, *Environ. Earth. Sci.*, 2011, **63**, 121–133.



230. L.-D. Xue, Y.-H. Lang, A.-X. Liu and J. Liu, *Environ. Monitor. Assess.*, 2010, **163**, 57–65.
231. J.-T. Wang, L.-J. Tan, W.-H. Zhang and Z.-R. Lian, *Environmental Science*, 2010, **31**, 2713–2722.
232. P. J. Van den Brink and B. J. Kater, *Ecotoxicology*, 2006, **15**, 451–460.
233. H. J. C. Klamer, P. E. G. Leonards, M. H. Lamoree, L. A. Villerius, J. E. Åkerman and J. F. Bakker, *Chemosphere*, 2005, **58**, 1579–1587.
234. M. Sanders, *Archives of Environmental Contamination and Toxicology*, 2004, **28**, 397–405.
235. J. C. Colombo, N. Cappelletti, J. Laschi, M. C. Migoya, E. Speranza and C. N. Skorupka, *Environ. Sci. Tech.*, 2005, **39**, 8227–8234.
236. P. Muniz, E. Danulat, B. Yannicelli, J. García-Alonso, G. Medina and M. C. Bicego, *Environment International*, 2004, **29**, 1019–1028.
237. P. M. Sherblom, D. Kelly and R. H. Pierce, *Marine Pollution Bulletin*, 1995, **30**, 568–573.
238. M. Notar, H. Leskovšek and J. Faganeli, *Mar. Pollut. Bull.*, 2001, **42**, 36–44.
239. P. M. Medeiros and M. C. Bicego, *Mar. Pollut. Bull.*, 2004, **49**, 892–899.
240. P. M. Medeiros, M. C. Bicego, R. M. Castelo, C. Del Rosso, G. Fillmann and A. J. Zambon, *Environment International*, 2005, **31**, 77–87.
241. H. H. Soclo, P. Garrigues and M. Ewald, *Mar. Pollut. Bull.*, 2000, **40**, 387–396.

242. M. Charlesworth, M. Service and C. E. Gibson, *Mar. Pollut. Bull.*, 2002, **44**, 1421–1434.
243. H. Nakata, Y. Sakai, T. Miyawaki and A. Takemura, *Environ. Sci. Tech.*, 2003, **37**, 3513–3521.
244. J.-Y. Cho, J. G. Son, B.-J. Park and B.-Y. Chung, *Environmental Monitoring and Assessment*, 2009, **149**, 385–393.
245. N. Ohkouchi, K. Kawamura and H. Kawahata, 1999, **33**, 3086–3090.
246. A. E. Bence, K. A. Kvenvolden and M. C. Kennicutt, *Organic Geochemistry*, 1996, **24**, 7–42.
247. J. V. Macías-Zamora, E. Mendoza-Vega and A. Villaescusa-Celaya, *Chemosphere*, 2002, **46**, 459–468.
248. C. Basheer, J. P. Obbard and H. K. Lee, *Water, Air, and Soil Pollution*, 2003, **149**, 315–325.
249. K. Z. El Deeb, T. O. Said, M. H. El Naggar and M. A. Shreadah, *Bull. Environ. Contam. Toxicol.*, 2007, **78**, 373–379.
250. S. Ünlü and B. Alpar, *Chemosphere*, 2006, **64**, 764–777.
251. M. Tsapakis, E. G. Stephanou and I. Karakassis, *Mar. Chem.*, 2003, **80**, 283–298.
252. G. Mille, L. Asia, M. Guiliano, L. Malleret and P. Doumenq, *Marine Pollution Bulletin*, 2007, **54**, 566–575.
253. A. E. Nemr, A. Khaled, A. El-Sikaily, T. O. Said and A. M. A. Abd-Allah, *Environmental Monitoring and Assessment*, 2006, **DOI:**

**10.1007/s10661-005-9009-4.**

254. M. J. Simpson, B. Chefetz, A. P. Deshmukh and P. G. Hatcher, *Marine Environmental Research*, 2005, **59**, 139–163.
255. N. Bihari, M. Fafand 瘳 1, B. Hamer and B. Kralj-Bilen, *Science of The Total Environment*, 2006, **366**, 602–611.
